# Supplementary material for: Evaluation of the Performance of the Cobas CT/NG Test for Use on the Cobas 6800/8800 Systems for Detection of Chlamydia trachomatis and Neisseria gonorrhoeae in Male and Female Urogenital Samples
Source: PubMed Central journal article supplement (PMC6440774; doi:10.1128/jcm.01996-18), 2019-03-28
Supplement: JCM.01996-18-s0001.pdf [file JCM.01996-18-s0001.pdf]

**SUPPLEMENTARY INFORMATION**

**TABLE S1** Determination of patient infected status from urogenital specimens from women and urine specimens from men

| Sample type        | BD ProbeTec™ CT/GC Q <sup>x</sup> | Hologic APTIMA Combo 2® CT/NG | Abbott RealTime CT/NG | PIS                                        |
|--------------------|-----------------------------------|-------------------------------|-----------------------|--------------------------------------------|
| Women <sup>a</sup> | Urine/vaginal                     | Urine/vaginal                 |                       |                                            |
|                    | +/+                               | +/+                           | NA                    | Infected                                   |
|                    | +/+                               | +/- or -/+                    | NA                    | Infected                                   |
|                    | +/- or -/+                        | +/+                           | NA                    | Infected                                   |
|                    | +/-                               | -/+                           | NA                    | Infected                                   |
|                    | -/+                               | +/- or -/+                    | NA                    | Infected                                   |
|                    | -/+                               | +/-                           | NA                    | Infected (urine)<br>Not infected (vaginal) |
|                    | +/- or -/+                        | -/-                           | NA                    | Not infected                               |
|                    | +/+                               | -/-                           | NA                    | Not infected                               |
|                    | -/-                               | +/+                           | NA                    | Not infected                               |
|                    | -/-                               | +/- or -/+                    | NA                    | Not infected                               |
| -/-                | -/-                               | NA                            | Not infected          |                                            |
| Men <sup>b</sup>   | <b>Urine</b>                      | <b>Urine</b>                  |                       |                                            |
|                    | +                                 | +                             | +                     | Infected                                   |
|                    | +                                 | +                             | -                     | Infected                                   |
|                    | +                                 | -                             | +                     | Infected                                   |
|                    | -                                 | +                             | +                     | Infected                                   |
|                    | -                                 | -                             | +                     | Not infected                               |
|                    | -                                 | +                             | -                     | Not infected                               |
|                    | +                                 | -                             | -                     | Not infected                               |
| -                  | -                                 | -                             | Not infected          |                                            |

CT, *Chlamydia trachomatis*; GC, *Neisseria gonorrhoeae*; NG, *Neisseria gonorrhoeae*;

NA, not applicable; PIS, patient infected status.

<sup>a</sup>PIS was defined as positive if ≥1 result was positive in each assay; PIS was defined as negative by any other combination of results. PIS was considered indeterminate if results for ≥1 sample type were invalid and the results of the remaining sample types were discordant.

*Clinical Performance of the cobas® CT/NG Test*

<sup>b</sup> PIS was defined as positive if  $\geq 2$  of 3 test results were positive; PIS was defined as negative by any other combination of results. PIS was considered indeterminate if 1 test result was invalid or missing and the other 2 test results were discordant, or if  $\geq 2$  of 3 test results were invalid.
